# Supplementary material for: Impact of the Construction of New Port Facilities on the Biomass and Species Composition of Phytoplankton in the Neva Estuary (Baltic Sea)
Source: MDPI journal article supplement (doi:10.3390/jmse11010032), 2022-12-27
Supplement: s1 [file s1]

**Article: Impact of the construction of new port facilities on the biomass and species composition of phytoplankton in the Neva Estuary (Baltic Sea)**

**The authors: Mikhail Golubkov<sup>1\*</sup>, Vera Nikulina<sup>1</sup>, Sergey Golubkov<sup>1</sup>**

**<sup>1</sup>Zoological Institute of Russian Academy of Sciences, St.-Petersburg, Russian Federation.**

**\*Corresponding author: e-mail: golubkov\_ms@mail.ru**

**Supplementary Table S1.** Phytoplankton species composition, number of occurrences and biomass of algae in the Neva Estuary in 2003–2020.

| Class         | Species                                                                       | Number of occurrence | Biomass<br>[mg m <sup>-3</sup> ] |
|---------------|-------------------------------------------------------------------------------|----------------------|----------------------------------|
| Chlorophyceae | <i>Actinastrum hantzschii</i> Lagerheim 1882                                  | 66                   | 0.2-718.1                        |
|               | <i>Ankistrodesmus fusiformis</i> Corda 1838                                   | 5                    | 27.2-744.9                       |
|               | <i>Binuclearia lauterbornii</i> (Schmidle) Proschkina-Lavrenko 1966           | 9                    | 6.1-117.3                        |
|               | <i>Botryococcus braunii</i> Kützing 1849                                      | 25                   | 1.9-696.6                        |
|               | <i>Chlamidomonas</i> sp.                                                      | 25                   | 13.4-2928.8                      |
|               | <i>Closterium</i> sp.                                                         | 10                   | 0.9-69.1                         |
|               | <i>Closterium aciculare</i> T.West 1860                                       | 7                    | 12.9-195.9                       |
|               | <i>Closterium acutum</i> Brébisson 1848                                       | 8                    | 3.3-176.4                        |
|               | <i>Closterium diana</i> Ehrenberg ex Ralfs 1848                               | 7                    | 71.1-418.1                       |
|               | <i>Closterium gracile</i> Brébisson ex Ralfs 1848                             | 2                    | 53.1-64.9                        |
|               | <i>Closterium pronum</i> Brébisson 1856                                       | 2                    | 64.5-69.3                        |
|               | <i>Coelastrum cambricum</i> W.Archer 1868                                     | 1                    | 191.0                            |
|               | <i>Coelastrum microporum</i> Nägeli 1855                                      | 65                   | 1.2-1440.0                       |
|               | <i>Coelastrum sphaericum</i> Nägeli 1849                                      | 2                    | 28.4-1713.6                      |
|               | <i>Coenochloris</i> sp.                                                       | 6                    | 2.6-80.6                         |
|               | <i>Cosmarium margaritifерum</i> Meneghini ex Ralfs 1848                       | 3                    | 17.0-1293.1                      |
|               | <i>Crucigenia tetrapedia</i> (Kirchner) Kuntze 1898                           | 15                   | 2.7-163.2                        |
|               | <i>Crucigeniella irregularis</i> (Wille) P.M.Tsarenko & D.M.John 2002         | 10                   | 1.9-102.2                        |
|               | <i>Desmodesmus communis</i> (E.Hegewald) E.Hegewald 2000                      | 21                   | 0.3-716.8                        |
|               | <i>Desmodesmus denticulatus</i> (Lagerheim) S.S.An, T.Fiedl & E.Hegewald 1999 | 1                    | 151.1                            |
|               | <i>Dictyosphaerium ehrenbergianum</i> Nägeli 1849                             | 1                    | 754.5                            |
|               | <i>Euastrum</i> sp.                                                           | 2                    | 4.7-7.8                          |
|               | <i>Eudorina elegans</i> Ehrenberg 1832                                        | 23                   | 0.6-550.1                        |
|               | <i>Gloeotila</i> sp.                                                          | 4                    | 1.7-170.1                        |
|               | <i>Golenkinia radiata</i> Chodat 1894                                         | 3                    | 64.1-212.0                       |
|               | <i>Kirchneriella obesa</i> (West) West & G.S.West 1894                        | 1                    | 38.3                             |
|               | <i>Koliella spiralis</i> Kuosa 1988                                           | 2                    | 8.5                              |
|               | <i>Lagerheimia genevensis</i> (Chodat) Chodat 1895                            | 1                    | 2.8                              |
|               | <i>Micractinium pusillum</i> Fresenius 1858                                   | 44                   | 4.3-1598.4                       |
|               | <i>Monoraphidium contortum</i> (Thuret) Komárková-Legnerová 1969              | 132                  | 1.8-448.0                        |

|              |                                                                                                               |    |            |
|--------------|---------------------------------------------------------------------------------------------------------------|----|------------|
|              | <i>Monoraphidium minutum</i> (Nägeli)<br>Komárková-Legnerová 1969                                             | 4  | 6.8-33.6   |
|              | <i>Mougeotia</i> sp.                                                                                          | 94 | 0.1-2744.0 |
|              | <i>Mucidosphaerium pulchellum</i><br>(H.C.Wood) C.Bock, Proschold &<br>Krienitz 2011                          | 55 | 1.2-7833.6 |
|              | <i>Nephrocytium limneticum</i> (G.M.<br>Smith) G.M. Smith 1933                                                | 5  | 14.9-87.7  |
|              | <i>Nephrocytium minus</i> (Nägeli) Archer                                                                     | 3  | 0.8-1.6    |
|              | <i>Oocystis borgei</i> J.W.Snow 1903                                                                          | 4  | 7.9-236.4  |
|              | <i>Oocystis lacustris</i> Chodat 1897                                                                         | 11 | 0.1-151.2  |
|              | <i>Pandorina morum</i> (O.F.Müller) Bory<br>1826                                                              | 41 | 1.4-3350.5 |
|              | <i>Pediastrum duplex</i> Meyen 1829                                                                           | 48 | 1.3-569.6  |
|              | <i>Pseudodidymocystis planctonica</i><br>(Korshikov) E.Hegewald & Deason<br>1989                              | 1  | 9.1        |
|              | <i>Pseudopediastrum boryanum</i> (Turpin)<br>E.Hegewald 2005                                                  | 49 | 1.9-480.0  |
|              | <i>Pseudosphaerocystis lacustris</i><br>(Lemmermann) Nováková 1965                                            | 9  | 1.5-4855.2 |
|              | <i>Pyramimonas</i> sp.                                                                                        | 7  | 8.4-124.1  |
|              | <i>Selenastrum bibraianum</i> Reinsch 1866                                                                    | 3  | 26.5-801.4 |
|              | <i>Sphaerocystis planctonica</i><br>(Korshikov) Bourrelly 1974                                                | 15 | 4.3-1393.5 |
|              | <i>Sphaerocystis schroeteri</i> Chodat 1897                                                                   | 33 | 0.3-1422.0 |
|              | <i>Spirogyra</i> sp.                                                                                          | 1  | 1373.4     |
|              | <i>Stauridium tetras</i> (Ehrenberg)<br>E.Hegewald 2005                                                       | 17 | 0.7-88.3   |
|              | <i>Staurodesmus</i> sp.                                                                                       | 1  | 3.7        |
|              | <i>Staurodesmus controversus</i> var.<br><i>crassus</i> (West & GSWest) Coesel &<br>Meesters 2013             | 1  | 1.8        |
|              | <i>Tetradesmus lagerheimii</i> M.J.Wynne<br>& Guiry 2016                                                      | 54 | 0.8-383.0  |
|              | <i>Tetradesmus obliquus</i> (Turpin)<br>M.J.Wynne 2016                                                        | 54 | 1.1-420.0  |
|              | <i>Tetraëdron minimum</i> (A.Braun)<br>Hansgirg 1889                                                          | 5  | 14.1-410.2 |
|              | <i>Tetrastrum glabrum</i> (Y.V.Roll)<br>Ahlstrom & Tiffany 1934                                               | 18 | 0.8-353.2  |
|              | <i>Ulothrix</i> sp.                                                                                           | 6  | 1.8-836.8  |
| Cyanophyceae | <i>Anathece clathrata</i> (West &<br>G.S.West) Komárek, Kastovsky &<br>Jezberová 2011                         | 43 | 1.5-691.9  |
|              | <i>Aphanizomenon flos-aquae</i> Ralfs ex<br>Bornet & Flahault 1886                                            | 73 | 3.6-6389.9 |
|              | <i>Aphanizomenon gracile</i> Lemmermann<br>1907                                                               | 27 | 3.4-962.7  |
|              | <i>Aphanocapsa reinboldii</i> (Richter)<br>Komárek & Anagnostidis 1995                                        | 54 | 1.2-1848.5 |
|              | <i>Chroococcus minutus</i> (Kützinger)<br>Nägeli 1849                                                         | 2  | 13.8-374.4 |
|              | <i>Chroococcus turgidus</i> (Kützinger)<br>Nägeli 1849                                                        | 2  | 3.8-24.0   |
|              | <i>Coelosphaerium kuetzingianum</i><br>Nägeli 1849                                                            | 47 | 0.6-1581.1 |
|              | <i>Dolichospermum circinale</i> (Brébisson<br>ex Bornet & Flahault) P.Wacklin,<br>L.Hoffmann & J.Komárek 2009 | 10 | 9.1-1263.0 |

|                   |                                                                                                                        |     |                  |
|-------------------|------------------------------------------------------------------------------------------------------------------------|-----|------------------|
|                   | <i>Dolichospermum flos-aquae</i><br>(Brébisson ex Bornet & Flahault)<br>P.Wacklin, L.Hoffmann & J.Komárek<br>2009      | 84  | 2.9-5153.8       |
|                   | <i>Dolichospermum lemmermannii</i><br>(Brébisson ex Bornet & Flahault)<br>P.Wacklin, L.Hoffmann & J.Komárek<br>2009    | 7   | 10.0-115.5       |
|                   | <i>Dolichospermum scheremetieviae</i><br>(Brébisson ex Bornet & Flahault)<br>P.Wacklin, L.Hoffmann & J.Komárek<br>2009 | 10  | 58.1-3526.5      |
|                   | <i>Dolichospermum spiroides</i> (Klebhan)<br>Wacklin, L.Hoffmann & Komárek<br>2009                                     | 20  | 1.9-200.0        |
|                   | <i>Limnococcus limneticus</i><br>(Lemmermann) Komárková,<br>Jezberová, O.Komárek & Zapomelová<br>2010                  | 2   | 7.2-10.7         |
|                   | <i>Limnothrix planctonica</i><br>(Woloszynska) Meffert 1988                                                            | 70  | 2.6-4155.2       |
|                   | <i>Merismopedia tenuissima</i><br>Lemmermann 1898                                                                      | 22  | 0.3-108.4        |
|                   | <i>Merismopedia tranquilla</i> (Ehrenberg)<br>Trevisan 1845                                                            | 8   | 1.2-158.2        |
|                   | <i>Microcystis aeruginosa</i> (Kützing)<br>Kützing 1846                                                                | 1   | 28.7             |
|                   | <i>Microcystis pulverea</i> (H.C.Wood)<br>Forti 1907                                                                   | 53  | 1.1-133.4        |
|                   | <i>Microcystis wesenbergii</i> (Komárek)<br>Komárek ex Komárek 2006                                                    | 9   | 26.6-360.0       |
|                   | <i>Nodularia spumigena</i> Mertens ex<br>Bornet & Flahault 1888                                                        | 9   | 6.9-542.5        |
|                   | <i>Oscillatoria</i> sp.                                                                                                | 15  | 27.9-1506.4      |
|                   | <i>Oscillatoria tenuis</i> C.Agardh ex<br>Gomont 1892                                                                  | 6   | 12.4-584.8       |
|                   | <i>Planktolyngbia limnetica</i><br>(Lemmermann) Komárková-<br>Legnerová & Cronberg 1992                                | 45  | 0.5-5238.9       |
|                   | <i>Planktothrix agardhii</i> (Gomont)<br>Anagnostidis & Komárek 1988                                                   | 74  | 1.2-8800.0       |
|                   | <i>Pseudanabaena limnetica</i><br>(Lemmermann) Komárek 1974                                                            | 25  | 1.2-505.3        |
|                   | <i>Snowella lacustris</i> (Chodat) Komárek<br>& Hindák 1988                                                            | 70  | 1.8-1466.4       |
|                   | <i>Synechococcus elongatus</i> (Nägeli)<br>Nägeli 1849                                                                 | 2   | 64.8-9579.4      |
|                   | <i>Woronichinia compacta</i><br>(Lemmermann) Komárek & Hindák<br>1988                                                  | 7   | 11.1-77.7        |
| Bacillariophyceae | <i>Asterionella formosa</i> Hassall 1850                                                                               | 75  | 0.4-337.8        |
|                   | <i>Aulacoseira distans</i> (Ehrenberg)<br>Simonsen 1979                                                                | 3   | 0.1-39.6         |
|                   | <i>Aulacoseira islandica</i> (O.Müller)<br>Simonsen 1979                                                               | 104 | 4.6-3315.7       |
|                   | <i>Aulacoseira italica</i> (Ehrenberg)<br>Simonsen 1979                                                                | 10  | 1.0-222.3        |
|                   | <i>Aulacoseira muzzanensis</i> (F.Meister)<br>Krammer 1991                                                             | 4   | 264.6-<br>3230.9 |

|               |                                                                                                          |    |             |
|---------------|----------------------------------------------------------------------------------------------------------|----|-------------|
|               | <i>Belonastrum berolinense</i><br>(Lemmermann) Round & Maidana<br>2001                                   | 51 | 0.1-4075.5  |
|               | <i>Chaetoceros wighamii</i> Brightwell<br>1856                                                           | 1  | 26.7        |
|               | <i>Diatoma elongata</i> (Lyngbye)<br>C.Agardh 1824                                                       | 3  | 1.8-25.0    |
|               | <i>Diatoma tenuis</i> C.Agardh 1812                                                                      | 4  | 6.6-510.0   |
|               | <i>Fragilaria crotonensis</i> Kitton 1869                                                                | 57 | 0.5-452.9   |
|               | <i>Lindavia bodanica</i> (Eulenstein ex<br>Grunow) T.Nakov, Guillory, Julius,<br>Theriot & Alverson 2015 | 1  | 27.4        |
|               | <i>Lindavia glomerata</i> (H.Bachmann)<br>Adesalu & Julius 2017                                          | 60 | 0.5-6364.8  |
|               | <i>Pantocsekiella kuetzingiana</i><br>(Thwaites) K.T.Kiss & E.Ács 2016                                   | 67 | 5.9-16127.4 |
|               | <i>Rhizosolenia longissima</i> Hustedt 1906                                                              | 9  | 5.4-128.0   |
|               | <i>Skeletonema</i> sp.                                                                                   | 8  | 79.1-6405.6 |
|               | <i>Skeletonema. subsalsum</i> (Cleve-Euler)<br>Bethge 1928                                               | 78 | 3.2-2528.1  |
|               | <i>Stephanodiscus</i> sp.                                                                                | 1  | 1.1         |
|               | <i>Stephanodiscus hantzschii</i> Grunow<br>1880                                                          | 26 | 0.2-288.0   |
|               | <i>Synedra</i> sp.                                                                                       | 1  | 12.4        |
|               | <i>Tabellaria fenestrata</i> (Lyngbye)<br>Kützing 1844                                                   | 81 | 2.6-2100.8  |
|               | <i>Tabellaria flocculosa</i> (Roth) Kützing<br>1844                                                      | 18 | 3.9-505.7   |
|               | <i>Thalassiosira baltica</i> (Grunow)<br>Ostenfeld 1901: 290                                             | 2  | 32.9-49.8   |
|               | <i>Ulnaria acus</i> (Kützing) Aboal 2003                                                                 | 25 | 2.7-367.4   |
| Chrysophyceae | <i>Chrysococcus rufescens</i> Klebs 1892                                                                 | 7  | 0.6-151.3   |
|               | <i>Dinobryon</i> sp.                                                                                     | 2  | 3.6-7.2     |
|               | <i>Dinobryon divergens</i> O.E.Imhof 1887                                                                | 47 | 1.2-1680.0  |
|               | <i>Dinobryon bavaricum</i> Imhof 1890                                                                    | 5  | 8.3-109.4   |
|               | <i>Dinobryon sociale</i> (Ehrenberg)<br>Ehrenberg 1834                                                   | 4  | 63.5-100.8  |
|               | <i>Mallomonas</i> sp.                                                                                    | 15 | 3.4-107.4   |
|               | <i>Mallomonas charkowiensis</i> Swirenko<br>1913                                                         | 10 | 2.0-258.4   |
|               | <i>Mallomonas elegans</i> Lemmermann<br>1904                                                             | 6  | 3.8-141.5   |
|               | <i>Mallomonas splendens</i> (G.S.West)<br>Playfair 1913                                                  | 1  | 85.4        |
|               | <i>Synura uvella</i> Ehrenberg 1834                                                                      | 2  | 6.3-143.7   |
|               | <i>Uroglenopsis americana</i><br>(G.N.Calkins) Lemmermann 1899                                           | 1  | 19.2        |
| Dynophyceae   | <i>Apocalathium aciculiferum</i><br>(Lemmermann) Craveiro, Daugbjerg,<br>Moestrup & Calado 2016          | 41 | 1.6-2349.5  |
|               | <i>Ceratium hirundinella</i> (O.F.Müller)<br>Dujardin 1841                                               | 49 | 32.0-3200.0 |
|               | <i>Glenodinium</i> sp                                                                                    | 31 | 1.4-152.2   |

|                |                                                                  |     |             |
|----------------|------------------------------------------------------------------|-----|-------------|
|                | <i>Gymnodinium</i> sp                                            | 13  | 5.2-2304.0  |
|                | <i>Peridiniella catenata</i> (Levander)<br>Balech 1977           | 3   | 49.5-85.5   |
|                | <i>Peridinium</i> sp.                                            | 5   | 43.9-544.5  |
|                | <i>Peridinium cinctum</i> (O.F.Müller)<br>Ehrenberg 1832         | 29  | 48.0-2664.0 |
|                | <i>Protodinium bipes</i> (Paulsen) Balech<br>1974                | 3   | 8.3-49.9    |
| Cryptophyceae  | <i>Cryptomonas</i> sp                                            | 4   | 7.3-127.7   |
|                | <i>Cryptomonas erosa</i> Ehrenberg 1832                          | 104 | 4.5-4384.0  |
|                | <i>Cryptomonas marssonii</i> Skuja 1948                          | 80  | 2.8-2491.2  |
|                | <i>Cryptomonas ovata</i> Ehrenberg 1832                          | 58  | 1.3-7056.0  |
|                | <i>Cryptomonas phaseolus</i> Skuja 1948                          | 16  | 2.7-321.2   |
|                | <i>Komma caudata</i> (L.Geitler)<br>D.R.A.Hill 1991              | 131 | 1.6-1296.9  |
|                |                                                                  |     |             |
| Euglenophyceae | <i>Lepocinclis acus</i> (O.F.Müller)<br>B.Marin & Melkonian 2003 | 15  | 4.2-825.0   |
|                | <i>Trachelomonas</i> sp.                                         | 10  | 16.5-2356.0 |
|                | <i>Trachelomonas hispida</i> (Perty) F.Stein<br>1878             | 1   | 22.8        |
|                | <i>Trachelomonas volvocina</i> (Ehrenberg)<br>Ehrenberg 1834     | 41  | 5.9-4680.0  |
|                |                                                                  |     |             |
| Xanthophyceae  | <i>Tribonema affine</i> (Kützing) G.S.West<br>1904               | 18  | 0.6-1177.5  |

#
